# Supplementary material for: A Systematic Review of Fitness Apps and Their Potential Clinical and Sports Utility for Objective and Remote Assessment of Cardiorespiratory Fitness
Source: PubMed Central journal article supplement (PMC6422959; doi:10.1007/s40279-019-01084-y), 2019-03-01
Supplement: 40279_2019_1084_MOESM1_ESM.pdf [file 40279_2019_1084_MOESM1_ESM.pdf]

**ELECTRONIC SUPPLEMENTARY MATERIAL** from the article by Muntaner-Mas et al. “A Systematic Review of Fitness Apps and Their Potential Clinical and Sports Utility for Objective and Remote Assessment of Cardiorespiratory Fitness”

|                                                                                                                           |              |
|---------------------------------------------------------------------------------------------------------------------------|--------------|
| <b>Table 1.</b> Scientific literature search strategy used and number of articles found in Pubmed. ....                   | <b>2</b>     |
| <b>Table 2.</b> Scientific literature search strategy used and number of articles found in Web of Science® .....          | <b>3</b>     |
| <b>Table 3.</b> Scientific literature search strategy used and number of articles found in Scopus™ .....                  | <b>4</b>     |
| <b>Table 4.</b> Scientific literature search strategy used and number of articles found in SPORTDiscus. ....              | <b>5</b>     |
| <b>Table 5.</b> Apps’ markets search strategy used and a number of apps in the iTunes and Google Play stores. ....        | <b>6</b>     |
| <b>Table 6.</b> Mobile App Rating Scale (MARS) mean and domains scores of fitness apps stored in App Store (iTunes). .... | <b>7-8</b>   |
| <b>Table 7.</b> Mobile App Rating Scale (MARS) mean and domains scores of fitness apps stored in Google Play apps.....    | <b>9-10</b>  |
| <b>Table 8.</b> Qualitative assessment of fitness apps stored in App Store (iTunes).....                                  | <b>11-14</b> |
| <b>Table 9.</b> Qualitative assessment of fitness apps stored in Google Play.....                                         | <b>15-18</b> |

**ELECTRONIC SUPPLEMENTARY MATERIAL** from the article by Muntaner-Mas et al. “A Systematic Review of Fitness Apps and Their Potential Clinical and Sports Utility for Objective and Remote Assessment of Cardiorespiratory Fitness”

**Table 1.** Scientific literature search strategy used and number of articles found in Pubmed.

| Search criteria 1                                                                                                                              | Search criteria 2                                                                                                                                                                        |                                                                                                                                                                                                                                 |
|------------------------------------------------------------------------------------------------------------------------------------------------|------------------------------------------------------------------------------------------------------------------------------------------------------------------------------------------|---------------------------------------------------------------------------------------------------------------------------------------------------------------------------------------------------------------------------------|
|                                                                                                                                                | 2.1 Assessment terms                                                                                                                                                                     | 2.2 Cardiorespiratory fitness                                                                                                                                                                                                   |
| Mobile Applications (Mesh) OR Cell Phones (Mesh) OR Smartphone (Mesh) OR Smartphone App OR Smartphone Application OR iPhone App OR Android App | Exercise Tolerance (Mesh) OR Exercise Test (Mesh) OR Physical Fitness (Mesh) OR Athletic Performance (Mesh) OR Reproducibility Of Results (Mesh) OR Task Performance And Analysis (Mesh) | Cardiorespiratory Fitness (Mesh) OR Oxygen Consumption OR (Mesh) Walk Test (Mesh) OR Walking Speed (Mesh) OR Cardiovascular Fitness OR Aerobic Fitness OR Aerobic Capacity OR Maximal Oxygen Consumption OR VO <sub>2</sub> max |
| <b>Items found<br/>(Combining Criteria<br/>(1 “AND” 2.1) OR (1 “AND” 2.1))</b>                                                                 | 561                                                                                                                                                                                      | 35                                                                                                                                                                                                                              |
| <b>Total items found<br/>(after deleting duplicates)</b>                                                                                       | <b>575</b>                                                                                                                                                                               |                                                                                                                                                                                                                                 |

**General search equation (n = 575):**

((((((((((("Mobile Applications"[Mesh]) OR "Cell Phones"[Mesh]) OR "Smartphone"[Mesh])) OR smartphone app) OR smartphone application) OR iPhone app) OR Android App)) AND (((("Exercise Tolerance"[Mesh]) OR "Exercise Test"[Mesh]) OR "Physical Fitness"[Mesh]) OR "Athletic Performance"[Mesh]) OR "Reproducibility of Results"[Mesh]) OR "Task Performance and Analysis"[Mesh]) AND ("2000/01/01"[PDat]: "2018/09/30"[PDat]))) OR (((((((((((("Mobile Applications"[Mesh]) OR "Cell Phones"[Mesh]) OR "Smartphone"[Mesh])) OR smartphone app) OR smartphone application) OR iPhone app) OR Android App)) AND (((((((("Cardiorespiratory Fitness"[Mesh]) OR "Oxygen Consumption"[Mesh]) OR "Walk Test"[Mesh]) OR "Walking Speed"[Mesh])) OR cardiovascular fitness) OR aerobic fitness) OR aerobic capacity) OR maximal oxygen consumption) OR VO<sub>2</sub>max) AND ("2000/01/01"[PDat] : "2018/09/30"[PDat])))

**ELECTRONIC SUPPLEMENTARY MATERIAL** from the article by Muntaner-Mas et al. “A Systematic Review of Fitness Apps and Their Potential Clinical and Sports Utility for Objective and Remote Assessment of Cardiorespiratory Fitness”

**Table 2.** Scientific literature search strategy used and number of articles found in Web of Science®.

| Search criteria 1                                                                                          | Search criteria 2                      |                                                                                                                                                                       |
|------------------------------------------------------------------------------------------------------------|----------------------------------------|-----------------------------------------------------------------------------------------------------------------------------------------------------------------------|
|                                                                                                            | 2.1 Assessment terms                   | 2.2 Cardiorespiratory fitness                                                                                                                                         |
| Mobile Applications OR Smartphone OR Smartphone App OR Smartphone Application OR iPhone App OR Android App | Physical Fitness OR Physical Condition | Cardiorespiratory Fitness OR Oxygen Consumption OR Cardiovascular Fitness OR Aerobic Fitness OR Aerobic Capacity OR Maximal Oxygen Consumption OR VO <sub>2</sub> max |
| <b>Items found<br/>(Combining Criteria<br/>(1 “AND” 2.1) OR (1 “AND” 2.1))</b>                             | 771                                    | 79                                                                                                                                                                    |
| <b>Total items found<br/>(after deleting duplicates)</b>                                                   | <b>804</b>                             |                                                                                                                                                                       |

**General search equation (n = 804):**

(TS=(mobile applications) OR TS=(smartphone) OR TS=(smartphone app) OR TS=(smartphone application) OR TS=(iPhone App) OR TS=(Android App)) AND (TS=(physical fitness) OR TS=(physical condition)) OR (TS=(mobile applications) OR TS=(smartphone) OR TS=(smartphone app) OR TS=(smartphone application) OR TS=(iPhone App) OR TS=(Android App)) AND (TS=(cardiorespiratory fitness) OR TS=(oxygen consumption) OR TS=(cardiovascular fitness) OR TS=(aerobic fitness) OR TS=(aerobic capacity) OR TS=(maximal oxygen consumption) OR TS=(VO<sub>2</sub>max))

**ELECTRONIC SUPPLEMENTARY MATERIAL** from the article by Muntaner-Mas et al. “A Systematic Review of Fitness Apps and Their Potential Clinical and Sports Utility for Objective and Remote Assessment of Cardiorespiratory Fitness”

**Table 3.** Scientific literature search strategy used and number of articles found in Scopus™.

| Search criteria 1                                                                                          | Search criteria 2                 |                                                                                                                  |
|------------------------------------------------------------------------------------------------------------|-----------------------------------|------------------------------------------------------------------------------------------------------------------|
|                                                                                                            | 2.1 Assessment terms              | 2.2 Cardiorespiratory fitness                                                                                    |
| Mobile Applications OR Smartphone OR Smartphone App OR Smartphone Application OR iPhone App OR Android App | Physical Fitness OR Exercise Test | Cardiorespiratory Fitness OR Oxygen Consumption OR Cardiovascular Fitness OR Aerobic Fitness OR Aerobic Capacity |
| <b>Items found (Combining Criteria (1 “AND” 2.1) OR (1 “AND” 2.1))</b>                                     | 528                               | 428                                                                                                              |
| <b>Total items found (after deleting duplicates)</b>                                                       | <b>826</b>                        |                                                                                                                  |

**General search equation (n = 826):**

(ALL ( "mobile applications" ) OR ALL ( "smartphone" ) OR ALL ( "smartphone app" ) OR ALL ( "smartphone application" ) OR ALL ( "iPhone App" ) OR ALL ( "Android App" ) AND ( ALL ( "Physical Fitness" ) OR ALL ( "Exercise test" ) ) AND PUBYEAR > 2000) OR ((ALL ( "mobile applications" ) OR ALL ( "smartphone" ) OR ALL ( "smartphone app" ) OR ALL ( "smartphone application" ) OR ALL ( "iPhone App" ) OR ALL ( "Android App" )) AND (ALL ( "Cardiorespiratory Fitness" ) OR ALL ( "Cardiovascular Fitness" ) OR ALL ( "Aerobic Fitness" ) OR ALL ( "Oxygen Consumption" ) OR ALL ( "Aerobic Capacity" )) AND PUBYEAR > 2000)

**ELECTRONIC SUPPLEMENTARY MATERIAL** from the article by Muntaner-Mas et al. “A Systematic Review of Fitness Apps and Their Potential Clinical and Sports Utility for Objective and Remote Assessment of Cardiorespiratory Fitness”

**Table 4.** Scientific literature search strategy used and number of articles found in SPORTDiscus.

| Search criteria 1                                                                                          | Search criteria 2                                                |                                                                                                                                                          |
|------------------------------------------------------------------------------------------------------------|------------------------------------------------------------------|----------------------------------------------------------------------------------------------------------------------------------------------------------|
|                                                                                                            | <b>2.1 Assessment terms</b>                                      | <b>2.2 Cardiorespiratory fitness</b>                                                                                                                     |
| Mobile Applications OR Smartphone OR Smartphone App OR Smartphone Application OR iPhone App OR Android App | Physical Fitness OR Exercise Tests OR Reproducibility Of Results | Cardiorespiratory Fitness OR Oxygen Consumption OR Cardiovascular Fitness OR Aerobic Fitness OR Aerobic Capacity OR Maximal Oxygen Consumption OR VO2max |
| <b>Items found<br/>(Combining Criteria 1 “AND” 2)</b>                                                      | 523                                                              | 187                                                                                                                                                      |
| <b>Total items found<br/>(after deleting duplicates)</b>                                                   | <b>591</b>                                                       |                                                                                                                                                          |

**General search equation (n = 591):**

( TX ( mobile applications OR smartphone OR smartphone app OR smartphone application OR iPhone App OR Android App ) AND TX ( physical fitness OR exercise tests OR Reproducibility Of Results ) ) OR ( TX ( mobile applications OR smartphone OR smartphone app OR smartphone application OR iPhone App OR Android App ) AND TX ( Cardiorespiratory Fitness OR Oxygen Consumption OR Cardiovascular Fitness OR Aerobic Fitness OR Aerobic Capacity OR Maximal Oxygen Consumption OR VO2max ) )

**ELECTRONIC SUPPLEMENTARY MATERIAL** from the article by Muntaner-Mas et al. “A Systematic Review of Fitness Apps and Their Potential Clinical and Sports Utility for Objective and Remote Assessment of Cardiorespiratory Fitness”

**Table 5.** Apps’ markets search strategy used and a number of apps in the iTunes and Google Play stores.

| <b>Limits</b>                                                                | <b>Search criteria</b>      |                                      |
|------------------------------------------------------------------------------|-----------------------------|--------------------------------------|
|                                                                              | <b>1.1 Assessment terms</b> | <b>1.2 Cardiorespiratory fitness</b> |
| Smartphone applications<br>the focus in cardiorespiratory fitness<br>testing | Fitness test                | Walk test OR VO2max OR<br>Yo-Yo test |
| <b>Items found</b>                                                           | 97                          | 595                                  |
| <b>Total items found</b>                                                     | <b>692</b>                  |                                      |

**App Store (iTunes)**

Dates of the search: October 2018 Total #Hits = 201

#Hits by search terms:

Fitness test [97], walk test [14], VO2max [33], yo-yo test [58]

**Google Play**

Dates of the search: October 2018 Total #Hits = 490

#Hits by search terms:

Walk test [249], VO2max [241]

**ELECTRONIC SUPPLEMENTARY MATERIAL** from the article by Muntaner-Mas et al. “A Systematic Review of Fitness Apps and Their Potential Clinical and Sports Utility for Objective and Remote Assessment of Cardiorespiratory Fitness”

**Table 6.** Mobile App Rating Scale (MARS) mean and domains scores of fitness apps stored in App Store (iTunes).

|    | <b>App name</b>                                               | <b>Engagement</b> | <b>Functionality</b> | <b>Aesthetics</b> | <b>Information</b> | <b>MARS Mean</b> | <b>Subjective</b> | <b>Perceived Impact</b> |
|----|---------------------------------------------------------------|-------------------|----------------------|-------------------|--------------------|------------------|-------------------|-------------------------|
| 1  | <u>HRV4Training</u>                                           | 5.00              | 5.00                 | 5.00              | 5.00               | 5.00             | 5.00              | 5.00                    |
| 2  | <u>MyHeart Counts</u>                                         | 4.20              | 5.00                 | 5.00              | 3.86               | 4.51             | 4.50              | 4.50                    |
| 3  | <u>Fitness Test pro</u>                                       | 3.60              | 5.00                 | 5.00              | 3.83               | 4.36             | 4.50              | 4.17                    |
| 4  | <u>AeroExaminer - Aerobic VO2 Max Test &amp; Conditioning</u> | 4.40              | 3.75                 | 4.33              | 4.57               | 4.26             | 4.50              | 2.83                    |
| 5  | <u>CardioCoach</u>                                            | 4.00              | 3.75                 | 5.00              | 3.86               | 4.15             | 4.00              | 4.00                    |
| 6  | <u>iWalkAssess</u>                                            | 2.40              | 4.75                 | 4.00              | 4.67               | 3.95             | 3.25              | 2.50                    |
| 7  | <u>Team Bleep Test</u>                                        | 3.80              | 4.25                 | 4.33              | 3.29               | 3.92             | 3.25              | 3.83                    |
| 8  | <u>CycleCoach - Fitness Test</u>                              | 3.60              | 4.00                 | 4.33              | 3.20               | 3.78             | 4.25              | 2.67                    |
| 9  | <u>Multi Stage Pacer Test</u>                                 | 2.80              | 4.75                 | 4.00              | 3.25               | 3.70             | 2.00              | 1.17                    |
| 10 | <u>Police Fitness</u>                                         | 2.80              | 4.75                 | 4.00              | 3.17               | 3.68             | 1.75              | 1.00                    |
| 11 | <u>Bleep Test Pro - 15m &amp; 20m - Beep Test Shuttle Run</u> | 2.60              | 5.00                 | 4.33              | 2.75               | 3.67             | 1.00              | 1.50                    |
| 12 | <u>BEEP TEST TRAINER</u>                                      | 3.40              | 4.25                 | 4.00              | 3.00               | 3.66             | 3.25              | 2.67                    |
| 13 | <u>Max O2</u>                                                 | 3.00              | 4.00                 | 4.33              | 3.00               | 3.58             | 1.00              | 1.33                    |
| 14 | <u>examen de aptitud</u>                                      | 2.40              | 4.50                 | 3.67              | 3.50               | 3.52             | 2.00              | 2.50                    |
| 15 | <u>Multi Stage VO2 max Beep Test</u>                          | 4.00              | 4.00                 | 3.67              | 2.33               | 3.50             | 4.00              | 2.33                    |
| 16 | <u>Eklblom-Bak Cycle Test</u>                                 | 2.80              | 4.00                 | 2.33              | 4.60               | 3.43             | 1.25              | 2.00                    |
| 17 | <u>AF Fitness Assessment</u>                                  | 2.40              | 4.00                 | 2.33              | 4.83               | 3.39             | 1.75              | 2.67                    |
| 18 | <u>BEEP TEST TEAM TRAINER</u>                                 | 2.80              | 4.00                 | 4.33              | 2.40               | 3.38             | 1.50              | 2.00                    |
| 19 | <u>Bleep Test - Fitness Tests</u>                             | 3.40              | 3.75                 | 4.00              | 2.00               | 3.29             | 1.75              | 2.33                    |
| 20 | <u>3 Minute Step Test - DIY Fitness Assessment</u>            | 2.80              | 4.50                 | 3.33              | 2.50               | 3.28             | 2.00              | 2.50                    |
| 21 | <u>Bleep.Test</u>                                             | 2.80              | 4.25                 | 2.67              | 3.00               | 3.18             | 2.00              | 1.33                    |
| 22 | <u>Beep Test Training Guide</u>                               | 2.40              | 4.00                 | 2.00              | 4.29               | 3.17             | 1.75              | 4.17                    |
| 23 | <u>Treadmill Tracker</u>                                      | 3.00              | 3.50                 | 2.33              | 3.75               | 3.15             | 2.25              | 2.00                    |
| 24 | <u>Beep Fitness Test</u>                                      | 2.80              | 4.00                 | 3.67              | 2.00               | 3.12             | 2.25              | 1.00                    |
| 25 | <u>UFT - Uber Fitness Test</u>                                | 2.80              | 4.50                 | 2.67              | 2.50               | 3.12             | 2.00              | 1.00                    |
| 26 | <u>The Beep Test</u>                                          | 2.60              | 3.50                 | 3.67              | 2.57               | 3.08             | 2.50              | 2.83                    |
| 27 | <u>FitnessMeter - Test &amp; Measure</u>                      | 2.80              | 3.00                 | 2.33              | 4.17               | 3.08             | 3.25              | 2.33                    |

**ELECTRONIC SUPPLEMENTARY MATERIAL** from the article by Muntaner-Mas et al.  
 “A Systematic Review of Fitness Apps and Their Potential Clinical and Sports Utility for  
 Objective and Remote Assessment of Cardiorespiratory Fitness”

|    |                                                               |                    |                    |                    |                    |                    |                    |                    |
|----|---------------------------------------------------------------|--------------------|--------------------|--------------------|--------------------|--------------------|--------------------|--------------------|
| 28 | <u>6MWT Lite</u>                                              | 3.80               | 2.50               | 3.33               | 2.50               | 3.03               | 1.50               | 1.50               |
| 29 | <u>6MWT</u>                                                   | 3.60               | 2.50               | 3.00               | 2.50               | 2.90               | 1.00               | 1.50               |
| 30 | <u>6MWD</u>                                                   | 2.40               | 4.50               | 2.67               | 2.00               | 2.89               | 1.00               | 1.00               |
| 31 | <u>The Beep Test Free</u>                                     | 2.60               | 3.75               | 2.00               | 3.00               | 2.84               | 2.75               | 1.67               |
| 32 | <u>Fit Test</u>                                               | 3.40               | 4.25               | 2.67               | 1.00               | 2.83               | 2.50               | 1.00               |
| 33 | <u>Beep Test</u>                                              | 2.20               | 4.00               | 3.33               | 1.67               | 2.80               | 2.00               | 1.00               |
| 34 | <u>Bleep Test Lite</u>                                        | 2.60               | 3.75               | 3.33               | 1.50               | 2.80               | 1.75               | 1.00               |
| 35 | <u>Bleep Test Solo</u>                                        | 2.60               | 3.75               | 3.33               | 1.50               | 2.80               | 1.75               | 1.00               |
| 36 | <u>T4T - Test4Training</u>                                    | 2.00               | 4.00               | 3.00               | 2.00               | 2.75               | 1.00               | 1.00               |
| 37 | <u>Prueba Pacer VO2 Max Cardio y Shuttle Bleep</u>            | 2.60               | 3.75               | 2.33               | 2.00               | 2.67               | 2.75               | 2.33               |
| 38 | <u>VO2 Prueba De Pitidos Max - Pacer, Bleep &amp; Shuttle</u> | 3.20               | 3.25               | 2.00               | 1.67               | 2.53               | 1.00               | 1.67               |
| 39 | <u>BEEP TEST SLIM</u>                                         | 1.40               | 3.25               | 2.00               | 2.80               | 2.36               | 1.50               | 1.17               |
| 40 | <u>Music Beep Test - Pacer &amp; Shuttle Run Fitness Test</u> | 2.20               | 4.00               | 2.00               | 1.00               | 2.30               | 1.75               | 1.50               |
| 41 | <u>Shuttle Fit Trainer</u>                                    | 2.00               | 3.25               | 2.33               | 1.50               | 2.27               | 1.25               | 1.00               |
| 42 | <u>Test de Cooper</u>                                         | 2.40               | 3.25               | 1.33               | 2.00               | 2.25               | 1.00               | 1.50               |
| 43 | <u>YO YO Endurance Test</u>                                   | 2.20               | 2.00               | 1.33               | 3.25               | 2.20               | 1.00               | 1.00               |
| 44 | <u>Beep Test: Examen de Ejército Policía Militares</u>        | 1.80               | 3.50               | 2.33               | 1.00               | 2.16               | 1.00               | 1.00               |
| 45 | <u>Beep Test (Multi-Stage)</u>                                | 1.80               | 3.75               | 1.33               | 1.00               | 1.97               | 1.00               | 1.00               |
| 46 | <u>VO2max Calculator</u>                                      | 1.20               | 2.00               | 2.33               | 1.00               | 1.63               | 1.00               | 1.00               |
|    | <b>Average (SD)</b>                                           | <b>2.86 (0.77)</b> | <b>3.89 (0.71)</b> | <b>3.19 (1.04)</b> | <b>2.76 (1.11)</b> | <b>3.17 (0.70)</b> | <b>2.20 (1.15)</b> | <b>2.00 (1.08)</b> |



**ELECTRONIC SUPPLEMENTARY MATERIAL** from the article by Muntaner-Mas et al. “A Systematic Review of Fitness Apps and Their Potential Clinical and Sports Utility for Objective and Remote Assessment of Cardiorespiratory Fitness”

**Table 7.** Mobile App Rating Scale (MARS) mean and domains scores of fitness apps stored in Google Play apps.

|    | <b>App name</b>                                           | <b>Engagement</b> | <b>Functionality</b> | <b>Aesthetics</b> | <b>Information</b> | <b>MARS Mean</b> | <b>Subjective</b> | <b>Perceived Impact</b> |
|----|-----------------------------------------------------------|-------------------|----------------------|-------------------|--------------------|------------------|-------------------|-------------------------|
| 1  | <u>HRV4Training</u>                                       | 5.00              | 5.00                 | 5.00              | 5.00               | 5.00             | 5.00              | 5.00                    |
| 2  | <u>Fitness Test pro</u>                                   | 3.60              | 5.00                 | 5.00              | 3.83               | 4.36             | 4.50              | 4.17                    |
| 3  | <u>iWalkAssess</u>                                        | 2.40              | 4.75                 | 4.00              | 4.67               | 3.95             | 3.25              | 2.50                    |
| 4  | <u>Bruce Treadmill Test Lite</u>                          | 2.60              | 5.00                 | 3.33              | 4.00               | 3.73             | 1.75              | 1.83                    |
| 5  | <u>Bruce Treadmill Test Protocol</u>                      | 2.80              | 4.50                 | 3.33              | 3.20               | 3.46             | 1.50              | 1.50                    |
| 6  | <u>Physical V02 Fitness Beep Test</u>                     | 3.00              | 4.25                 | 3.33              | 3.20               | 3.45             | 2.25              | 1.50                    |
| 7  | <u>Marine Corps PT Calculator - USMC Physical Fitness</u> | 2.80              | 5.00                 | 3.33              | 2.60               | 3.43             | 1.50              | 1.33                    |
| 8  | <u>TOHRC Walk Test</u>                                    | 3.00              | 4.25                 | 3.33              | 3.14               | 3.43             | 2.25              | 1.00                    |
| 9  | <u>3 Minute Step Test</u>                                 | 2.80              | 4.75                 | 2.33              | 3.60               | 3.37             | 2.50              | 1.67                    |
| 10 | <u>blp - The Bleep Test App</u>                           | 2.40              | 4.25                 | 3.00              | 3.20               | 3.21             | 1.50              | 1.17                    |
| 11 | <u>Functional Assessment + G-Code</u>                     | 2.60              | 3.75                 | 3.33              | 3.00               | 3.17             | 2.00              | 1.50                    |
| 12 | <u>Run U2</u>                                             | 3.00              | 4.00                 | 2.67              | 2.50               | 3.04             | 2.00              | 1.00                    |
| 13 | <u>Fitness Assessments</u>                                | 2.40              | 4.25                 | 2.67              | 2.75               | 3.02             | 1.75              | 1.50                    |
| 14 | <u>Test de Léger</u>                                      | 1.80              | 3.75                 | 3.00              | 3.00               | 2.89             | 1.25              | 1.00                    |
| 15 | <u>12 Minute Vo2 Max Run Test</u>                         | 2.80              | 3.25                 | 3.33              | 2.00               | 2.85             | 1.25              | 1.17                    |
| 16 | <u>Physical Fitness V02 Beep Test</u>                     | 2.80              | 3.25                 | 3.33              | 2.00               | 2.85             | 1.25              | 1.17                    |
| 17 | <u>Shuttle Run VO2Max Pacer Test</u>                      | 2.80              | 3.25                 | 3.33              | 2.00               | 2.85             | 1.25              | 1.17                    |
| 18 | <u>Calculadora Funcional Trainer</u>                      | 2.20              | 4.00                 | 2.67              | 2.50               | 2.84             | 1.00              | 1.00                    |
| 19 | <u>Beep Test Pro</u>                                      | 2.60              | 4.25                 | 1.67              | 2.75               | 2.82             | 2.50              | 1.00                    |
| 20 | <u>Yo-Yo Intermittent Pro</u>                             | 3.00              | 3.75                 | 2.00              | 2.40               | 2.79             | 2.00              | 1.00                    |
| 21 | <u>Test de marcha de 6 minutos</u>                        | 2.60              | 2.75                 | 3.33              | 2.25               | 2.73             | 1.25              | 1.00                    |
| 22 | <u>Beep Test Calculator</u>                               | 1.80              | 5.00                 | 2.00              | 2.00               | 2.70             | 1.25              | 1.00                    |
| 23 | <u>Bruce Protocol Stress Calci</u>                        | 1.80              | 5.00                 | 2.00              | 2.00               | 2.70             | 1.25              | 1.00                    |
| 24 | <u>Army Fitness Calculator - APFT</u>                     | 1.80              | 3.75                 | 2.67              | 2.50               | 2.68             | 1.00              | 1.00                    |
| 25 | <u>Cardio Exercise Prescription</u>                       | 2.20              | 4.25                 | 2.00              | 2.00               | 2.61             | 1.00              | 1.50                    |
| 26 | <u>Astrand Cycle Fitness Calci</u>                        | 1.00              | 4.50                 | 2.33              | 2.50               | 2.58             | 1.00              | 1.00                    |
| 27 | <u>VO2 Max Calculator</u>                                 | 1.00              | 4.50                 | 2.33              | 2.50               | 2.58             | 1.00              | 1.00                    |

**ELECTRONIC SUPPLEMENTARY MATERIAL** from the article by Muntaner-Mas et al.  
 “A Systematic Review of Fitness Apps and Their Potential Clinical and Sports Utility for  
 Objective and Remote Assessment of Cardiorespiratory Fitness”

|           |                                                             |                    |                    |                    |                    |                    |                    |                    |
|-----------|-------------------------------------------------------------|--------------------|--------------------|--------------------|--------------------|--------------------|--------------------|--------------------|
| <b>28</b> | <u>FitCal - Fitness Calculators</u>                         | 2.40               | 3.50               | 1.33               | 2.80               | 2.51               | 1.25               | 2.50               |
| <b>29</b> | <u>Test VMA Pro</u>                                         | 2.80               | 2.50               | 2.00               | 2.60               | 2.48               | 2.00               | 1.17               |
| <b>30</b> | <u>V02 Calculadora</u>                                      | 1.80               | 3.50               | 1.67               | 2.80               | 2.44               | 1.00               | 1.00               |
| <b>31</b> | <u>eRunners</u>                                             | 2.40               | 3.25               | 1.00               | 2.80               | 2.36               | 1.50               | 1.50               |
| <b>32</b> | <u>Prueba Beep</u>                                          | 1.80               | 3.00               | 1.67               | 2.00               | 2.12               | 1.00               | 1.00               |
| <b>33</b> | <u>Yo-Yo Test Intermitente</u>                              | 1.80               | 3.00               | 1.67               | 2.00               | 2.12               | 1.00               | 1.00               |
| <b>34</b> | <u>AG-Evaluapp - Fitness Tests</u>                          | 1.40               | 4.25               | 1.00               | 1.60               | 2.06               | 1.00               | 1.00               |
| <b>35</b> | <u>FitCalc+ Fitness &amp; Health Calculator - Gym Tools</u> | 1.20               | 4.25               | 1.00               | 1.67               | 2.03               | 1.00               | 1.00               |
| <b>36</b> | <u>2.4 Km Run Test (Fitness Test)</u>                       | 1.20               | 3.00               | 1.00               | 2.60               | 1.95               | 1.00               | 1.00               |
| <b>37</b> | <u>Beep Test vocacional Ejército</u>                        | 1.20               | 3.50               | 1.00               | 2.00               | 1.93               | 1.00               | 1.00               |
| <b>38</b> | <u>Fitga Fitness Tracker</u>                                | 1.40               | 2.50               | 1.00               | 2.60               | 1.88               | 1.00               | 1.00               |
| <b>39</b> | <u>Fitness Test</u>                                         | 1.40               | 2.25               | 1.00               | 2.75               | 1.85               | 1.00               | 1.00               |
| <b>40</b> | <u>12 Minute Run Test (Cooper Test)</u>                     | 1.00               | 2.75               | 1.00               | 2.60               | 1.84               | 1.00               | 1.00               |
| <b>41</b> | <u>Astrand Treadmill Test (Vo2max Test)</u>                 | 1.00               | 2.75               | 1.00               | 2.60               | 1.84               | 1.00               | 1.00               |
| <b>42</b> | <u>Balke Vo2max Test</u>                                    | 1.00               | 2.75               | 1.00               | 2.60               | 1.84               | 1.00               | 1.00               |
|           | <b>Average</b>                                              | <b>2.20 (0.83)</b> | <b>3.83 (0.80)</b> | <b>2.36 (1.08)</b> | <b>2.69 (0.71)</b> | <b>2.77 (0.70)</b> | <b>1.59 (0.89)</b> | <b>1.38 (0.81)</b> |

**ELECTRONIC SUPPLEMENTARY MATERIAL** from the article by Muntaner-Mas et al. “A Systematic Review of Fitness Apps and Their Potential Clinical and Sports Utility for Objective and Remote Assessment of Cardiorespiratory Fitness”

**Table 8.** Qualitative assessment of fitness apps stored in App Store (iTunes).

|    | App name                                                               | Score | Ratings | Price   | Test mode                                                                  | Test instructions | HR  | GPS | VO2 estimation | External devices needed |
|----|------------------------------------------------------------------------|-------|---------|---------|----------------------------------------------------------------------------|-------------------|-----|-----|----------------|-------------------------|
| 1  | <a href="#">HRV4Training</a>                                           | 4.2   | 13      | 10.99 € | Published algorithms                                                       | Yes               | Yes | -   | Yes            | -                       |
| 2  | <a href="#">MyHeart Counts</a>                                         | 4.5   | 132     | 0.00 €  | 6 minutes walk test                                                        | Yes               | -   | Yes | Yes            | -                       |
| 3  | <a href="#">Fitness Test pro</a>                                       | 0     | 0       | 3.49 €  | Coopers 12-min run, Bruce treadmill test, Any distance run test, Beep-test | Yes               | -   | -   | Yes            | -                       |
| 4  | <a href="#">AeroExaminer - Aerobic VO2 Max Test &amp;</a>              | 0     | 0       | 4.49 €  | beep test, Yo-Yo Intermittent and a Treadmill Tests                        | Yes               | -   | -   | Yes            | Yes (treadmill)         |
| 5  | <a href="#">CardioCoach</a>                                            | 0     | 0       | 0.00 €  | -                                                                          | -                 | -   | -   | -              | -                       |
| 6  | <a href="#">iWalkAssess</a>                                            | 0     | 0       | 0.00 €  | 10-metre walk test; 6-minute walk test                                     | Yes               | -   | -   | -              | -                       |
| 7  | <a href="#">Team Bleep Test</a>                                        | 0     | 0       | 1.09 €  | YO YO Endurance Test, Standard Beep Test, Uk police test, UK Fire          | -                 | -   | -   | -              | -                       |
| 8  | <a href="#">CycleCoach - Fitness Test</a>                              | 0     | 0       | 0.00 €  | Cycling test                                                               | Yes               | -   | -   | -              | Yes (bike)              |
| 9  | <a href="#">Multi Stage Pacer Test</a>                                 | 0     | 0       | 0.00 €  | 20 meter shuttle run test                                                  | -                 | -   | -   | Yes            | -                       |
| 10 | <a href="#">Police Fitness</a>                                         | 0     | 0       | 2.29 €  | Chester test & 20 meter shuttle run test                                   | Yes               | -   | -   | -              | -                       |
| 11 | <a href="#">Bleep Test Pro - 15m &amp; 20m - Beep Test Shuttle Run</a> | 0     | 0       | 1.09 €  | 15 & 20 meter shuttle run test                                             | -                 | -   | -   | -              | -                       |
| 12 | <a href="#">BEEP TEST TRAINER</a>                                      | 0     | 0       | 3.49 €  | 20 meter shuttle run test                                                  | Yes               | -   | -   | Yes            | -                       |
| 13 | <a href="#">Max O2</a>                                                 | 0     | 0       | 0.00 €  | Ebbeling 1, Balke 1, Rockport walking test & 1-mile                        | -                 | -   | -   | Yes            | -                       |
| 14 | <a href="#">examen de aptitud</a>                                      | 0     | 0       | 0.00 €  | Step test                                                                  | Yes               | -   | -   | Yes            | Yes (step)              |
| 15 | <a href="#">Multi Stage VO2 max Beep Test</a>                          | 0     | 0       | 0.00 €  | 20 meter shuttle run test                                                  | Yes               | -   | -   | Yes            | -                       |
| 16 | <a href="#">Ekblom-Bak Cycle Test</a>                                  | 0     | 0       | 0.00 €  | Calculator                                                                 | Yes               | -   | -   | Yes            | -                       |
| 17 | <a href="#">AF Fitness Assessment</a>                                  | 0     | 0       | 2.29 €  | Calculator                                                                 | Yes               | -   | -   | -              | -                       |
| 18 | <a href="#">BEEP TEST TEAM TRAINER</a>                                 | 0     | 0       | 4.49 €  | 20 meter shuttle run test                                                  | Yes               | -   | -   | -              | -                       |
| 19 | <a href="#">Bleep Test - Fitness Tests</a>                             | 0     | 0       | 1.09 €  | 20 meter shuttle run test, Pull Ups test, Press Ups test & Sit Ups test    | -                 | -   | -   | Yes            | -                       |
| 20 | <a href="#">3 Minute Step Test - DIY Fitness Assessment</a>            | 0     | 0       | 5.49 €  | 3 Minute Step Test                                                         | Yes               | -   | -   | Yes            | Yes (step)              |
| 21 | <a href="#">Bleep.Test</a>                                             | 0     | 0       | 0.00 €  | Standard Beep Test, YO YO Endurance Test                                   | -                 | -   | -   | -              | -                       |
| 22 | <a href="#">Beep Test Training Guide</a>                               | 0     | 0       | 0.00 €  | 20 meter shuttle run test                                                  | Yes               | -   | -   | -              | -                       |
| 23 | <a href="#">Treadmill Tracker</a>                                      | 0     | 0       | 3.49 €  | -                                                                          | -                 | Yes | Yes | Yes            | -                       |
| 24 | <a href="#">Beep Fitness Test</a>                                      | 0     | 0       | 1.09 €  | 15, 20 & 40 meter shuttle run test                                         | Yes               | -   | -   | Yes            | -                       |
| 25 | <a href="#">UFT - Uber Fitness Test</a>                                | 0     | 0       | 0.00 €  | Cooper test, 300m run test                                                 | Yes               | -   | -   | -              | -                       |
| 26 | <a href="#">The Beep Test</a>                                          | 0     | 0       | 2.29 €  | 20 meter shuttle run test, YO YO Endurance Test                            | Yes               | -   | -   | Yes            | -                       |
| 27 | <a href="#">FitnessMeter - Test &amp; Measure</a>                      | 0     | 0       | 2.29 €  | 15 & 20 meter shuttle run test, Jump test, Abdominals test & Sprint test   | Yes               | -   | -   | Yes            | -                       |
| 28 | <a href="#">6MWT Lite</a>                                              | 0     | 0       | 0.00 €  | 6 minutes walk test                                                        | -                 | -   | -   | -              | -                       |
| 29 | <a href="#">6MWT</a>                                                   | 0     | 0       | 0.00 €  | 6 minutes walk test                                                        | -                 | -   | -   | -              | -                       |
| 30 | <a href="#">6MWD</a>                                                   | 0     | 1       | 0.00 €  | 6 minutes walk test                                                        | -                 | -   | -   | -              | -                       |
| 31 | <a href="#">The Beep Test Free</a>                                     | 0     | 0       | 0.00 €  | 20 meter shuttle run test                                                  | Yes               | -   | -   | Yes            | -                       |

**ELECTRONIC SUPPLEMENTARY MATERIAL** from the article by Muntaner-Mas et al. “A Systematic Review of Fitness Apps and Their Potential Clinical and Sports Utility for Objective and Remote Assessment of Cardiorespiratory Fitness”

|                              |                                                                        |   |   |        |                                                                                                                        |           |          |          |           |          |
|------------------------------|------------------------------------------------------------------------|---|---|--------|------------------------------------------------------------------------------------------------------------------------|-----------|----------|----------|-----------|----------|
| 32                           | <a href="#">Fit Test</a>                                               | 0 | 0 | 3.49 € | Calculator                                                                                                             | -         | -        | -        | Yes       | -        |
| 33                           | <a href="#">Beep Test</a>                                              | 0 | 0 | 3.49 € | 20 meter shuttle run test                                                                                              | Yes       | -        | -        | Yes       | -        |
| 34                           | <a href="#">Bleep Test Lite</a>                                        | 0 | 0 | 0.00 € | 20 meter shuttle run test                                                                                              | -         | -        | -        | Yes       | -        |
| 35                           | <a href="#">Bleep Test Solo</a>                                        | 0 | 0 | 1.09 € | 20m Bleep Test, Yo-Yo Intermittent Recovery, Yo-Yo Endurance and the official tests used by UK Police & Fire Services, | Yes       | -        | -        | Yes       | -        |
| 36                           | <a href="#">T4T - Test4Training</a>                                    | 0 | 0 | 0.00 € | -                                                                                                                      | -         | -        | -        | Yes       | -        |
| 37                           | <a href="#">Prueba Pacer VO2 Max Cardio y Shuttle Bleep</a>            | 0 | 0 | 5.49 € | 20 meter shuttle run test                                                                                              | Yes       | -        | -        | Yes       | -        |
| 38                           | <a href="#">VO2 Prueba De Pitidos Max - Pacer, Bleep &amp; Shuttle</a> | 0 | 0 | 0.00 € | 20 meter shuttle run test                                                                                              | -         | -        | -        | Yes       | -        |
| 39                           | <a href="#">BEEP TEST SLIM</a>                                         | 0 | 0 | 1.09 € | 20 meter shuttle run test                                                                                              | Yes       | -        | -        | Yes       | -        |
| 40                           | <a href="#">Music Beep Test - Pacer &amp; Shuttle Run Fitness Test</a> | 0 | 0 | 2.29 € | 15 & 20 meter shuttle run test                                                                                         | -         | -        | -        | Yes       | -        |
| 41                           | <a href="#">Shuttle Fit Trainer</a>                                    | 0 | 0 | 1.09 € | 20 meter shuttle run test                                                                                              | Yes       | -        | -        | -         | -        |
| 42                           | <a href="#">Test de Cooper</a>                                         | 0 | 0 | 0.00 € | Cooper Test                                                                                                            | -         | -        | -        | -         | -        |
| 43                           | <a href="#">YO YO Endurance Test</a>                                   | 0 | 0 | 3.49 € | YO YO Endurance Test                                                                                                   | Yes       | -        | -        | -         | -        |
| 44                           | <a href="#">Beep Test: Examen de Ejército Policía Militares</a>        | 0 | 0 | 0.00 € | 15 & 20 meter shuttle run test                                                                                         | Yes       | -        | -        | -         | -        |
| 45                           | <a href="#">Beep Test (Multi-Stage)</a>                                | 0 | 0 | 1.09 € | 20 meter shuttle run test                                                                                              | Yes       | -        | -        | -         | -        |
| 46                           | <a href="#">VO2max Calculator</a>                                      | 0 | 0 | 0.00 € | Calculator                                                                                                             | -         | -        | -        | Yes       | -        |
| <b>Total number of "Yes"</b> |                                                                        |   |   |        |                                                                                                                        | <b>28</b> | <b>2</b> | <b>2</b> | <b>27</b> | <b>4</b> |

"-" means the app doesn't contain the item

If the direct link does not work is because the app has been removed from the market

**ELECTRONIC SUPPLEMENTARY MATERIAL** from the article by Muntaner-Mas et al. “A Systematic Review of Fitness Apps and Their Potential Clinical and Sports Utility for Objective and Remote Assessment of Cardiorespiratory Fitness”

**Table 8,** Qualitative assessment of fitness apps stored in App Store (iTunes) (Continued),

| App name                                                                  | Historic measurements | Export results | Prompt self-monitoring | Social Network | Reference values | Scientific validation | Multiple users | Language                     | Update date | Sum of "Yes" |
|---------------------------------------------------------------------------|-----------------------|----------------|------------------------|----------------|------------------|-----------------------|----------------|------------------------------|-------------|--------------|
| 1 <a href="#">HRV4Training</a>                                            | Yes                   | Yes            | Yes                    | -              | -                | Yes                   | -              | English & Italian            | 26/09/2018  | 7            |
| 2 <a href="#">MyHeart Counts</a>                                          | Yes                   | Yes            | Yes                    | -              | Yes              | -                     | -              | English                      | 09/07/2018  | 7            |
| 3 <a href="#">Fitness Test pro</a>                                        | Yes                   | Yes            | -                      | Yes            | Yes              | -                     | Yes            | English                      | 19/09/2017  | 7            |
| 4 <a href="#">AeroExaminer - Aerobic VO2 Max Test &amp; Conditioning</a>  | Yes                   | Yes            | Yes                    | Yes            | -                | -                     | Yes            | English                      | 10/01/2017  | 8            |
| 5 <a href="#">CardioCoach</a>                                             | -                     | -              | -                      | -              | -                | -                     | -              | English                      | 04/10/2017  | 0            |
| 6 <a href="#">iWalkAssess</a>                                             | Yes                   | Yes            | -                      | Yes            | Yes              | Yes                   | -              | English                      | 05/20/2018  | 6            |
| 7 <a href="#">Team Bleep Test</a>                                         | Yes                   | Yes            | -                      | Yes            | Yes              | -                     | Yes            | English                      | 26/07/2017  | 5            |
| 8 <a href="#">CycleCoach - Fitness Test</a>                               | Yes                   | -              | Yes                    | Yes            | -                | -                     | -              | English & Japanese           | 06/05/2016  | 4            |
| 9 <a href="#">Multi Stage Pacer Test</a>                                  | -                     | -              | -                      | Yes            | -                | -                     | -              | English                      | 27/09/2017  | 2            |
| 10 <a href="#">Police Fitness</a>                                         | Yes                   | -              | -                      | -              | -                | -                     | -              | English                      | 13/10/2017  | 2            |
| 11 <a href="#">Bleep Test Pro - 15m &amp; 20m - Beep Test Shuttle Run</a> | Yes                   | -              | -                      | Yes            | -                | -                     | Yes            | English                      | 13/10/2017  | 3            |
| 12 <a href="#">BEEP TEST TRAINER</a>                                      | Yes                   | Yes            | -                      | Yes            | -                | -                     | Yes            | English                      | 25/01/2017  | 6            |
| 13 <a href="#">Max O2</a>                                                 | Yes                   | -              | -                      | -              | Yes              | -                     | -              | English                      | 14/12/2011  | 3            |
| 14 <a href="#">examen de aptitud</a>                                      | -                     | -              | -                      | Yes            | Yes              | -                     | -              | English                      | 01/04/2014  | 4            |
| 15 <a href="#">Multi Stage VO2 max Beep Test</a>                          | Yes                   | Yes            | -                      | Yes            | Yes              | -                     | Yes            | Spanish & English            | 20/08/2018  | 7            |
| 16 <a href="#">Ekblom-Bak Cycle Test</a>                                  | -                     | Yes            | -                      | -              | Yes              | -                     | -              | English & Swedish            | 07/11/2017  | 4            |
| 17 <a href="#">AF Fitness Assessment</a>                                  | -                     | -              | -                      | -              | Yes              | -                     | -              | English                      | 15/01/2018  | 3            |
| 18 <a href="#">BEEP TEST TEAM TRAINER</a>                                 | Yes                   | Yes            | -                      | -              | -                | -                     | Yes            | English                      | 25/01/2017  | 4            |
| 19 <a href="#">Bleep Test - Fitness Tests</a>                             | Yes                   | -              | -                      | -              | -                | -                     | -              | English, French & Portuguese | 27/04/2017  | 2            |
| 20 <a href="#">3 Minute Step Test - DIY Fitness Assessment</a>            | -                     | Yes            | -                      | Yes            | Yes              | -                     | -              | English                      | 09/02/2017  | 5            |
| 21 <a href="#">Bleep.Test</a>                                             | Yes                   | -              | -                      | -              | -                | -                     | Yes            | English                      | 27/10/2018  | 2            |
| 22 <a href="#">Beep Test Training Guide</a>                               | -                     | -              | -                      | -              | Yes              | -                     | -              | English                      | 24/11/2015  | 2            |
| 23 <a href="#">Treadmill Tracker</a>                                      | Yes                   | Yes            | -                      | -              | -                | -                     | -              | English                      | 20/11/2015  | 3            |
| 24 <a href="#">Beep Fitness Test</a>                                      | Yes                   | -              | -                      | -              | Yes              | -                     | -              | English                      | 08/09/2017  | 4            |
| 25 <a href="#">UFT - Uber Fitness Test</a>                                | -                     | -              | -                      | -              | Yes              | -                     | -              | English                      | 03/08/2015  | 2            |
| 26 <a href="#">The Beep Test</a>                                          | -                     | -              | -                      | Yes            | -                | -                     | Yes            | English                      | 05/10/2014  | 4            |
| 27 <a href="#">FitnessMeter - Test &amp; Measure</a>                      | -                     | Yes            | -                      | -              | Yes              | -                     | Yes            | English                      | 21/02/2018  | 6            |
| 28 <a href="#">6MWT Lite</a>                                              | Yes                   | Yes            | -                      | Yes            | -                | -                     | -              | Spanish, German & English    | 11/10/2013  | 3            |
| 29 <a href="#">6MWT</a>                                                   | Yes                   | Yes            | -                      | Yes            | -                | -                     | -              | Spanish, German & English    | 07/11/2013  | 3            |
| 30 <a href="#">6MWD</a>                                                   | Yes                   | Yes            | -                      | Yes            | -                | -                     | -              | Spanish, German & English    | 14/05/2017  | 3            |
| 31 <a href="#">The Beep Test Free</a>                                     | -                     | -              | -                      | Yes            | -                | -                     | Yes            | English                      | 16/09/2014  | 4            |

**ELECTRONIC SUPPLEMENTARY MATERIAL** from the article by Muntaner-Mas et al. “A Systematic Review of Fitness Apps and Their Potential Clinical and Sports Utility for Objective and Remote Assessment of Cardiorespiratory Fitness”

|                              |                                                                        |     |     |   |     |     |   |     |                                   |            |   |
|------------------------------|------------------------------------------------------------------------|-----|-----|---|-----|-----|---|-----|-----------------------------------|------------|---|
| 32                           | <a href="#">Fit Test</a>                                               | -   | Yes | - | Yes | -   | - | -   | English                           | 17/10/2014 | 3 |
| 33                           | <a href="#">Beep Test</a>                                              | Yes | Yes | - | -   | -   | - | Yes | English                           | 22/02/2017 | 5 |
| 34                           | <a href="#">Beep Test Lite</a>                                         | -   | -   | - | -   | -   | - | -   | English                           | 28/07/2017 | 1 |
| 35                           | <a href="#">Beep Test Solo</a>                                         | Yes | Yes | - | -   | -   | - | Yes | English                           | 26/07/2017 | 5 |
| 36                           | <a href="#">T4T - Test4Training</a>                                    | Yes | Yes | - | -   | Yes | - | -   | Spanish & English                 | 18/01/2018 | 4 |
| 37                           | <a href="#">Prueba Pacer VO2 Max Cardio y Shuttle Bleep</a>            | Yes | Yes | - | Yes | -   | - | Yes | Spanish & English                 | 16/03/2017 | 6 |
| 38                           | <a href="#">VO2 Prueba De Pitidos Max - Pacer, Bleep &amp; Shuttle</a> | Yes | -   | - | -   | -   | - | -   | English                           | 16/03/2017 | 2 |
| 39                           | <a href="#">BEEP TEST SLIM</a>                                         | Yes | Yes | - | -   | -   | - | -   | English                           | 25/01/2017 | 4 |
| 40                           | <a href="#">Music Beep Test - Pacer &amp; Shuttle Run Fitness Test</a> | -   | -   | - | -   | Yes | - | -   | English                           | 08/05/2014 | 2 |
| 41                           | <a href="#">Shuttle Fit Trainer</a>                                    | Yes | -   | - | -   | -   | - | -   | English                           | 30/11/2016 | 2 |
| 42                           | <a href="#">Test de Cooper</a>                                         | -   | -   | - | -   | Yes | - | -   | English                           | 15/09/2016 | 1 |
| 43                           | <a href="#">YO YO Endurance Test</a>                                   | -   | -   | - | -   | -   | - | -   | English                           | 24/10/2018 | 1 |
| 44                           | <a href="#">Beep Test: Examen de Ejército Policía Militares</a>        | -   | -   | - | -   | -   | - | -   | Spanish, German, French, English, | 22/06/2017 | 1 |
| 45                           | <a href="#">Beep Test (Multi-Stage)</a>                                | -   | -   | - | -   | -   | - | -   | English                           | 20/02/2018 | 1 |
| 46                           | <a href="#">VO2max Calculator</a>                                      | -   | -   | - | -   | -   | - | -   | English                           | 08/04/2015 | 1 |
| <b>Total number of "Yes"</b> |                                                                        | 27  | 22  | 4 | 18  | 17  | 2 | 14  |                                   |            |   |

"-" means the app doesn't contain the item

If the direct link does not work is because the app has been removed from the market

**ELECTRONIC SUPPLEMENTARY MATERIAL** from the article by Muntaner-Mas et al. “A Systematic Review of Fitness Apps and Their Potential Clinical and Sports Utility for Objective and Remote Assessment of Cardiorespiratory Fitness”

**Table 9,** Qualitative assessment of fitness apps stored in Google Play,

|    | App name                                                   | Score | Ratings | Downloads   | Price  | Test mode                                                                                                                     | Test instructions | HR  | GPS | VO2 estimation | External devices needed |
|----|------------------------------------------------------------|-------|---------|-------------|--------|-------------------------------------------------------------------------------------------------------------------------------|-------------------|-----|-----|----------------|-------------------------|
| 1  | <a href="#">HRV4Training</a>                               | 4.4   | 329     | 5,000+      | 9.99 € | Published algorithms                                                                                                          | Yes               | Yes | -   | Yes            | -                       |
| 2  | <a href="#">Fitness Test pro</a>                           | 4     | 67      | 1,000+      | 2.41 € | Coopers 12-min run, Bruce treadmill test, Any distance run test, Beep-test (Yo-Yo endurance test, The Andersen test, Watt-max | Yes               | -   | -   | Yes            | -                       |
| 3  | <a href="#">iWalkAssess</a>                                | -     | -       | 100+        | 0.00 € | 10m walk test and 6-min walking test                                                                                          | Yes               | -   | -   | -              | -                       |
| 4  | <a href="#">Bruce Treadmill Test Lite</a>                  | 3.4   | 8       | 1,000+      | 0.00 € | Bruce treadmill test                                                                                                          | -                 | -   | -   | Yes            | -                       |
| 5  | <a href="#">Bruce Treadmill Test Protocol</a>              | 0     | 0       | 10+         | 4.99 € | Bruce treadmill test                                                                                                          | Yes               | -   | -   | Yes            | -                       |
| 6  | <a href="#">Physical VO2 Fitness Beep Test</a>             | 3.8   | 16      | 500+        | 4.99 € | 20 meter shuttle run test                                                                                                     | Yes               | -   | -   | Yes            | -                       |
| 7  | <a href="#">Marine Corps PT Calculator - USMC Physical</a> | 3.8   | 19      | 5,000+      | 0.00 € | 3 mile run, MC Combat fitness test, MC physical fitness test                                                                  | -                 | -   | -   | -              | -                       |
| 8  | <a href="#">TOHRC Walk Test</a>                            | 3.5   | 2       | 100+        | 0.00 € | 2 and 6-min walking test                                                                                                      | -                 | -   | -   | -              | Yes                     |
| 9  | <a href="#">3 Minute Step Test</a>                         | 4     | 5       | 500+        | 6.49 € | YMCA step test                                                                                                                | Yes               | -   | -   | Yes            | -                       |
| 10 | <a href="#">blp - The Bleep Test App</a>                   | 3.5   | 67      | 10,000+     | 0.00 € | 20 meter shuttle run test                                                                                                     | Yes               | -   | -   | Yes            | -                       |
| 11 | <a href="#">Functional Assessment + G-Code</a>             | 4.8   | 22      | 500+        | 0.79 € | 6-min walking test                                                                                                            | Yes               | -   | -   | -              | -                       |
| 12 | <a href="#">Run U2</a>                                     | 4.4   | 76      | 5,000+      | 0.00 € | 7 minutes, Astrand-treadmill, Balke-track, Balke treadmill, Bruce-                                                            | Yes               | -   | -   | Yes            | -                       |
| 13 | <a href="#">Fitness Assessments</a>                        | 3.7   | 12      | 500+        | 3.34 € | Rockport test                                                                                                                 | -                 | -   | -   | Yes            | -                       |
| 14 | <a href="#">Test de Léger</a>                              | 4.2   | 331     | 50,000+     | 0.00 € | 20 meter shuttle run test                                                                                                     | Yes               | -   | -   | -              | -                       |
| 15 | <a href="#">12 Minute Vo2 Max Run Test</a>                 | 3.8   | 65      | 10,000+     | 0.00 € | Cooper Test                                                                                                                   | Yes               | -   | Yes | Yes            | -                       |
| 16 | <a href="#">Physical Fitness VO2 Beep Test</a>             | 3.9   | 283     | 50,000+     | 0.00 € | 20 meter shuttle run test                                                                                                     | Yes               | -   | -   | Yes            | -                       |
| 17 | <a href="#">Shuttle Run VO2Max Pacer Test</a>              | 3.8   | 78      | 10,000+     | 0.00 € | 15 meter shuttle run test                                                                                                     | Yes               | -   | -   | Yes            | -                       |
| 18 | <a href="#">Calculadora Funcional Trainer</a>              | 4.6   | 33      | 1,000+      | 0.00 € | 1,5 miles test                                                                                                                | -                 | -   | -   | Yes            | -                       |
| 19 | <a href="#">Beep Test Pro</a>                              | 4     | 45      | 5,000+      | 0.99 € | 20 meter shuttle run test                                                                                                     | -                 | -   | -   | Yes            | -                       |
| 20 | <a href="#">Yo-Yo Intermittent Pro</a>                     | 3.9   | 21      | 1,000+      | 0.99 € | 20 meter shuttle run test                                                                                                     | -                 | -   | -   | Yes            | -                       |
| 21 | <a href="#">Test de marcha de 6 minutos</a>                | 4.1   | 64      | 5,000+      | 0.00 € | 6-min walking test                                                                                                            | -                 | -   | -   | Yes            | -                       |
| 22 | <a href="#">Beep Test Calculator</a>                       | 4.5   | 2       | 1,000-5,000 | 0.00 € | 20 meter shuttle run test                                                                                                     | -                 | -   | -   | Yes            | -                       |
| 23 | <a href="#">Bruce Protocol Stress Calci</a>                | 1     | 1       | 100+        | 0.00 € | Bruce treadmill test                                                                                                          | -                 | -   | -   | Yes            | -                       |
| 24 | <a href="#">Army Fitness Calculator - APFT</a>             | 2.7   | 3       | 100 - 500   | 0.00 € | 2 mile run                                                                                                                    | -                 | -   | -   | -              | -                       |
| 25 | <a href="#">Cardio Exercise Prescription</a>               | 4.4   | 5       | 1,000+      | 0.00 € | 6MWT                                                                                                                          | -                 | -   | -   | Yes            | -                       |
| 26 | <a href="#">Astrand Cycle Fitness Calci</a>                | -     | -       | 100+        | 0.00 € | Astrand Cycle Fitness Test                                                                                                    | -                 | -   | -   | Yes            | -                       |
| 27 | <a href="#">VO2 Max Calculator</a>                         | 1     | 1       | 500+        | 0.00 € | -                                                                                                                             | -                 | -   | -   | Yes            | -                       |
| 28 | <a href="#">FitCal - Fitness Calculators</a>               | 4.5   | 12      | 500+        | 0.75 € | -                                                                                                                             | -                 | -   | -   | Yes            | -                       |
| 29 | <a href="#">Test VMA Pro</a>                               | 3     | 55      | 10,000+     | 0.00 € | Test piste Léger-Boucher                                                                                                      | Yes               | -   | -   | -              | -                       |
| 30 | <a href="#">VO2 Calculadora</a>                            | 2.8   | 4       | 1,000+      | 0.00 € | Rockport Walking test                                                                                                         | Yes               | -   | -   | Yes            | -                       |
| 31 | <a href="#">eRunners</a>                                   | 5     | 1       | 5+          | 1.49 € | Test de Cooper                                                                                                                | Yes               | -   | Yes | Yes            | -                       |
| 32 | <a href="#">Prueba Beep</a>                                | 3.8   | 723     | 100,000+    | 0.00 € | 20 meter shuttle run test                                                                                                     | -                 | -   | -   | Yes            | -                       |

**ELECTRONIC SUPPLEMENTARY MATERIAL** from the article by Muntaner-Mas et al. “A Systematic Review of Fitness Apps and Their Potential Clinical and Sports Utility for Objective and Remote Assessment of Cardiorespiratory Fitness”

|                              |                                                             |     |     |          |        |                                               |     |   |   |     |   |
|------------------------------|-------------------------------------------------------------|-----|-----|----------|--------|-----------------------------------------------|-----|---|---|-----|---|
| 33                           | <u>Yo-Yo Test Intermitente</u>                              | 4.5 | 243 | 50,000+  | 0.00 € | 20 meter shuttle run test                     | -   | - | - | Yes | - |
| 34                           | <u>AG-Evaluapp - Fitness Tests</u>                          | 4.7 | 15  | 1,000+   | 0.00 € | Course Navette, Yo-yo test                    | -   | - | - | Yes | - |
| 35                           | <u>FitCalc+ Fitness &amp; Health Calculator - Gym Tools</u> | 5   | 5   | 500+     | 0.00 € |                                               | -   | - | - | Yes | - |
| 36                           | <u>2,4 Km Run Test (Fitness Test)</u>                       | -   | -   | 100+     | 0.00 € | Test de Cooper                                | -   | - | - | Yes | - |
| 37                           | <u>Beep Test vocacional Ejercicio</u>                       | 3.9 | 533 | 100,000+ | 0.00 € | 20 meter shuttle run test                     | -   | - | - | -   | - |
| 38                           | <u>Fitga Fitness Tracker</u>                                | 4   | 10  | 500+     | 0.00 € | Rockport Fitness Walk Test and Treadmill test | Yes | - | - | Yes | - |
| 39                           | <u>Fitness Test</u>                                         | 3.8 | 40  | 10,000+  | 0.00 € | 20 meter shuttle run test                     | -   | - | - | Yes | - |
| 40                           | <u>12 Minute Run Test (Cooper Test)</u>                     | 5   | 4   | 500+     | 0.00 € | Test de Cooper                                | Yes | - | - | Yes | - |
| 41                           | <u>Astrand Treadmill Test (Vo2max Test)</u>                 | 5   | 1   | 100+     | 0.00 € | Astrand Treadmill Test                        | Yes | - | - | Yes | - |
| 42                           | <u>Balke Vo2max Test</u>                                    | 5   | 1   | 100+     | 0.00 € | Balke VO2max test                             | Yes | - | - | Yes | - |
| <b>Total number of "Yes"</b> |                                                             |     |     |          |        |                                               | 21  | 1 | 2 | 34  | 1 |

"-" means the app doesn't contain the item

If the direct link does not work is because the app has been removed from the market



**ELECTRONIC SUPPLEMENTARY MATERIAL** from the article by Muntaner-Mas et al. “A Systematic Review of Fitness Apps and Their Potential Clinical and Sports Utility for Objective and Remote Assessment of Cardiorespiratory Fitness”

**Table 9,** Qualitative assessment of fitness apps stored in Google Play (Continued),

| App name                                            | Historic measurements | Export results    | Prompt self-monitoring | Social Network | Reference values | Scientific validation | Multiple users | Update date | Sum of "Yes" |
|-----------------------------------------------------|-----------------------|-------------------|------------------------|----------------|------------------|-----------------------|----------------|-------------|--------------|
| 1 <a href="#">HRV4Training</a>                      | Yes                   | ,csv Format       | Yes                    | -              | -                | Yes                   | -              | 10/10/2018  | 7            |
| 2 <a href="#">Fitness Test pro</a>                  | Yes                   | Yes               | -                      | Yes            | Yes              | -                     | Yes            | 18/03/2013  | 7            |
| 3 <a href="#">iWalkAssess</a>                       | Yes                   | -                 | Yes                    | -              | Yes              | -                     | Yes            | 22/08/2018  | 5            |
| 4 <a href="#">Bruce Treadmill Test Lite</a>         | -                     | -                 | -                      | Yes            | -                | -                     | Yes            | 04/05/2014  | 3            |
| 5 <a href="#">Bruce Treadmill Test Protocol</a>     | Yes                   | -                 | -                      | Yes            | -                | -                     | Yes            | 04/05/2014  | 5            |
| 6 <a href="#">Physical V02 Fitness Beep Test</a>    | Yes                   | -                 | -                      | Yes            | Yes              | -                     | Yes            | 11/01/2017  | 6            |
| 7 <a href="#">Marine Corps PT Calculator - USMC</a> | Yes                   | -                 | -                      | -              | -                | -                     | -              | 23/05/2017  | 1            |
| 8 <a href="#">TOHRC Walk Test</a>                   | Yes                   | ,csv Format, .pdf | -                      | -              | -                | Yes                   | -              | 03/08/2017  | 3            |
| 9 <a href="#">3 Minute Step Test</a>                | -                     | -                 | -                      | Yes            | Yes              | -                     | -              | 01/04/2014  | 4            |
| 10 <a href="#">blp - The Bleep Test App</a>         | Yes                   | -                 | -                      | -              | -                | -                     | Yes            | 04/02/2014  | 4            |
| 11 <a href="#">Functional Assessment + G-Code</a>   | -                     | -                 | -                      | -              | Yes              | -                     | -              | 24/10/2018  | 2            |
| 12 <a href="#">Run U2</a>                           | -                     | -                 | -                      | -              | -                | -                     | -              | 18/02/2017  | 2            |
| 13 <a href="#">Fitness Assessments</a>              | Yes                   | ,xml Format       | -                      | Yes            | -                | -                     | Yes            | 09/03/2015  | 5            |
| 14 <a href="#">Test de Léger</a>                    | -                     | -                 | -                      | -              | -                | -                     | -              | 15/06/2015  | 1            |
| 15 <a href="#">12 Minute Vo2 Max Run Test</a>       | Yes                   | -                 | -                      | Yes            | Yes              | -                     | -              | 12/01/2017  | 6            |
| 16 <a href="#">Physical Fitness V02 Beep Test</a>   | Yes                   | -                 | -                      | Yes            | Yes              | -                     | -              | 11/01/2017  | 5            |
| 17 <a href="#">Shuttle Run VO2Max Pacer Test</a>    | Yes                   | -                 | -                      | Yes            | Yes              | -                     | -              | 11/01/2017  | 5            |
| 18 <a href="#">Calculadora Funcional Trainer</a>    | -                     | -                 | -                      | -              | -                | -                     | -              | 21/08/2017  | 1            |
| 19 <a href="#">Beep Test Pro</a>                    | Yes                   | Yes               | -                      | Yes            | -                | -                     | Yes            | 25/10/2018  | 5            |
| 20 <a href="#">Yo-Yo Intermittent Pro</a>           | Yes                   | ,csv Format       | -                      | Yes            | -                | -                     | Yes            | 26/10/2018  | 5            |
| 21 <a href="#">Test de marcha de 6 minutos</a>      | Yes                   | -                 | -                      | Yes            | -                | -                     | Yes            | 09/10/2013  | 4            |
| 22 <a href="#">Beep Test Calculator</a>             | -                     | -                 | -                      | -              | -                | -                     | -              | 03/10/2018  | 1            |
| 23 <a href="#">Bruce Protocol Stress Calci</a>      | -                     | -                 | -                      | -              | -                | -                     | -              | 01/10/2018  | 1            |
| 24 <a href="#">Army Fitness Calculator - APFT</a>   | Yes                   | -                 | -                      | -              | -                | -                     | -              | 27/12/2016  | 1            |
| 25 <a href="#">Cardio Exercise Prescription</a>     | -                     | -                 | -                      | -              | -                | -                     | -              | 16/06/2014  | 1            |
| 26 <a href="#">Astrand Cycle Fitness Calci</a>      | -                     | -                 | -                      | -              | Yes              | -                     | -              | 23/10/2018  | 2            |
| 27 <a href="#">VO2 Max Calculator</a>               | -                     | -                 | -                      | -              | Yes              | -                     | -              | 27/06/2017  | 2            |
| 28 <a href="#">FitCal - Fitness Calculators</a>     | -                     | -                 | -                      | -              | -                | -                     | -              | 17/10/2013  | 1            |
| 29 <a href="#">Test VMA Pro</a>                     | Yes                   | -                 | -                      | -              | -                | -                     | Yes            | 20/09/2017  | 3            |
| 30 <a href="#">V02 Calculadora</a>                  | -                     | -                 | -                      | -              | Yes              | -                     | -              | 25/08/2017  | 3            |
| 31 <a href="#">eRunners</a>                         | -                     | -                 | -                      | -              | -                | -                     | -              | 17/11/2013  | 3            |
| 32 <a href="#">Prueba Beep</a>                      | -                     | -                 | -                      | -              | -                | -                     | -              | 25/10/2018  | 1            |
| 33 <a href="#">Yo-Yo Test Intermitente</a>          | -                     | -                 | -                      | -              | -                | -                     | -              | 26/10/2018  | 1            |

**ELECTRONIC SUPPLEMENTARY MATERIAL** from the article by Muntaner-Mas et al. “A Systematic Review of Fitness Apps and Their Potential Clinical and Sports Utility for Objective and Remote Assessment of Cardiorespiratory Fitness”

|                              |                                                                |     |   |   |     |     |   |     |            |   |
|------------------------------|----------------------------------------------------------------|-----|---|---|-----|-----|---|-----|------------|---|
| 34                           | <a href="#">AG-Evaluapp - Fitness Tests</a>                    | Yes | - | - | Yes | -   | - | Yes | 24/08/2017 | 4 |
| 35                           | <a href="#">FitCalc+ Fitness &amp; Health Calculator - Gym</a> | -   | - | - | -   | -   | - | -   | 29/06/2018 | 1 |
| 36                           | <a href="#">2,4 Km Run Test (Fitness Test)</a>                 | Yes | - | - | -   | -   | - | Yes | 04/06/2018 | 3 |
| 37                           | <a href="#">Beep Test vocacional Ejército</a>                  | -   | - | - | -   | -   | - | -   | 29/01/2016 | 0 |
| 38                           | <a href="#">Fitga Fitness Tracker</a>                          | Yes | - | - | -   | -   | - | -   | 30/04/2015 | 3 |
| 39                           | <a href="#">Fitness Test</a>                                   | -   | - | - | -   | -   | - | -   | 03/01/2014 | 1 |
| 40                           | <a href="#">12 Minute Run Test (Cooper Test)</a>               | -   | - | - | -   | Yes | - | Yes | 14/06/2018 | 4 |
| 41                           | <a href="#">Astrand Treadmill Test (Vo2max Test)</a>           | -   | - | - | -   | Yes | - | Yes | 15/06/2018 | 4 |
| 42                           | <a href="#">Balke Vo2max Test</a>                              | -   | - | - | -   | Yes | - | Yes | 15/06/2018 | 4 |
| <b>Total number of "Yes"</b> |                                                                | 20  | 6 | 2 | 13  | 14  | 2 | 16  |            |   |

"-" means the app doesn't contain the item

If the direct link does not work is because the app has been removed from the market
